# Supplementary material
Source: PubMed Central journal article supplement (PMC7224611)
Supplement: NIHMS1583867-supplement-Supplementary_Information.pdf [file NIHMS1583867-supplement-Supplementary_Information.pdf]

## **Supplementary Information**

### **The Sympathetic Nervous System Regulates Skeletal Muscle Motor Innervation and Acetylcholine Receptor Stability**

Anna C. Zaia Rodrigues, Maria Laura Messi, Zhong-Min Wang, Martin C. Abba,  
Andrea Pereyra, Alexander Birbrair, Tan Zhang, Meaghan O'Meara, Ping Kwan,  
Elsa I. S. Lopez, Monte S. Willis, Akiva Mintz, D. Clark Files, Cristina Furdui,  
Ronald W. Oppenheim and Osvaldo Delbono

**Table S1****Antibodies used for immunoblot**

| <b>Antibody</b>                | <b>Dilution</b> | <b>Source</b>                               |
|--------------------------------|-----------------|---------------------------------------------|
| $\beta$ 2-AR                   | 1:750           | Abcam (#13989)                              |
| AChR                           | 1:1,000         | Biologend (#838301)                         |
| Akt-Phospho                    | 1:1,000         | Cell Signaling (#3787)                      |
| Akt-Total                      | 1:1,000         | Cell Signaling (#9271)                      |
| FoXO1-Phospho                  | 1:1,000         | Cell Signaling (#9461)                      |
| FoXO1-Total                    | 1:1,000         | Cell Signaling (#2860)                      |
| G <sub>ai1, 2, 3</sub>         | 1:200           | Santa Cruz (#136478)                        |
| G <sub>ai2</sub>               | 1:200           | Santa Cruz (#13534)                         |
| GAPDH                          | 1:40,000        | Genetex (#GTX627408)                        |
| HDAC4                          | 1:2,000         | Cell Signaling (#7628)                      |
| I $\kappa$ B-Phospho           | 1:200           | Santa Cruz (#8404)                          |
| I $\kappa$ B-Total             | 1:200           | Santa Cruz (#371)                           |
| MuRF1                          | 1:1,000         | R&D Systems (#AF5366)                       |
| Myogenin                       | 1:150           | Developmental Studies Hybridoma Bank (DSHB) |
| NF $\kappa$ B-Phospho          | 1:200           | Santa Cruz (#136548)                        |
| NF $\kappa$ B-Total            | 1:200           | Santa Cruz (#8008)                          |
| PKA (RI $\alpha$ )             | 1:1,000         | BD Biosciences (#610165)                    |
| PKA (RII $\alpha$ )            | 1:1,000         | BD Biosciences (#612242)                    |
| Rapsyn                         | 1:500           | Sigma (#R2029)                              |
| Tubulin                        | 1:1,000         | Sigma (#T6199)                              |
| Neurofilament-H                | 1:1,000         | Biologend (SMI 32)                          |
| Phosphorylated neurofilament-H | 1:1,000         | Biologend (SMI 31P)                         |
| Neurofilament-M                | 1:1,000         | Sigma (#N 5264)                             |
| Neurofilament-L                | 1:1,000         | Sigma (#N 5139)                             |
| PP2A (clone 1D6)               | 1: 1000         | Sigma (#05-421)                             |
| PP1a (clone 5E9)               | 1:1000          | Fisher (#PIMA517155)                        |

**Table S2**  
**qPCR Primers**

| <b>GENES</b>                         | <b>Primers*</b> |
|--------------------------------------|-----------------|
| <b>SKELETAL MUSCLE</b>               |                 |
| <i>Akt1</i>                          | Mm01331626_m1   |
| <i>Myod1</i>                         | Mm00440387_m1   |
| <i>Crebbp</i>                        | Mm01342452_m1   |
| <i>Foxp1</i>                         | Mm00474848_m1   |
| <i>Per1</i>                          | Mm00501813_m1   |
| <i>Vt1b</i>                          | Mm00444004_m1   |
| <i>Ube2g2</i>                        | Mm00502312_m1   |
| <i>Neurl1a</i>                       | Mm00480473_g1   |
| <i>Vamp3</i>                         | Mm01268442_g1   |
| <i>Chrna1</i>                        | Mm00431629_m1   |
| <i>Chrng</i>                         | Mm00437419_m1   |
| <i>Myog</i>                          | Mm00446194_m1   |
| <i>Stxbp1</i>                        | Mm00436837_m1   |
| <i>Musk</i>                          | Mm01346929_m1   |
| <i>FoxO1</i>                         | Mm00490671_m1   |
| <i>FoxO3</i>                         | Mm01185722_m1   |
| <i>MuRF1</i>                         | Mm01185221_m1   |
| <i>Hdac4</i>                         | Mm01299557_m1   |
| <i>Gadd45a</i>                       | Mm00432802_m1   |
| <i>Fbxo32</i><br>( <i>atrogen1</i> ) | Mm01207878_m1   |
| <b>SYMPATHETIC GANGLIA</b>           |                 |
| <i>Ngfr</i>                          | Mm00446296_m1   |
| <i>Ap1b1</i>                         | Mm01187764_m1   |
| <i>Mpz</i>                           | Mm00485141_g1   |
| <i>Mbp</i>                           | Mm01266402_m1   |
| <i>Egr2</i>                          | Mm00456650_m1   |
| <i>Ncam1</i>                         | Mm01149710_m1   |
| <i>Ngf</i>                           | Mm00443039_m1   |
| <i>Bdnf</i>                          | Mm04230607_s1   |
| <i>Gdnf</i>                          | Mm00599849_m1   |
| <i>Gapdh</i>                         | Mm99999915_g1   |

\* ThermoFisher Scientific.

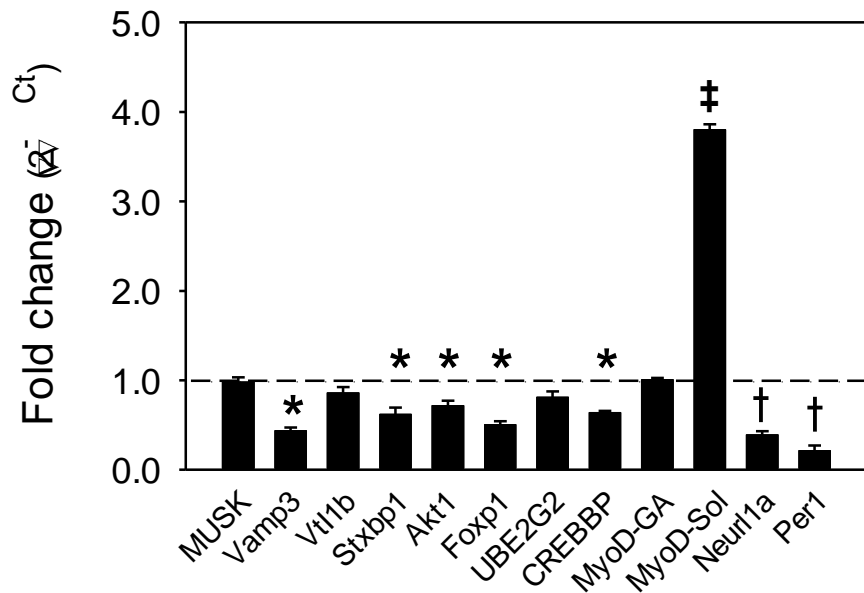

**Figure S1. Fold-change ( $2^{-\Delta\Delta C_t}$ ) of mRNA expression in sympathectomized compared to sham mice.** *MyoD-Sol* significantly increased, but *Vamp3*, *Stxbp1*, *Akt1*, *Foxp1*, *CREBBP*, *Neurl1a*, and *Per1* gene expression significantly decreased 7 days after sympathectomy. The difference between sympathectomized and sham mice GA muscle was not significant for all the other genes. N = 4 GA or Soleus muscles from 4 mice per group. \*  $P < 0.05$ , †  $P < 0.01$  and ‡  $P < 0.001$

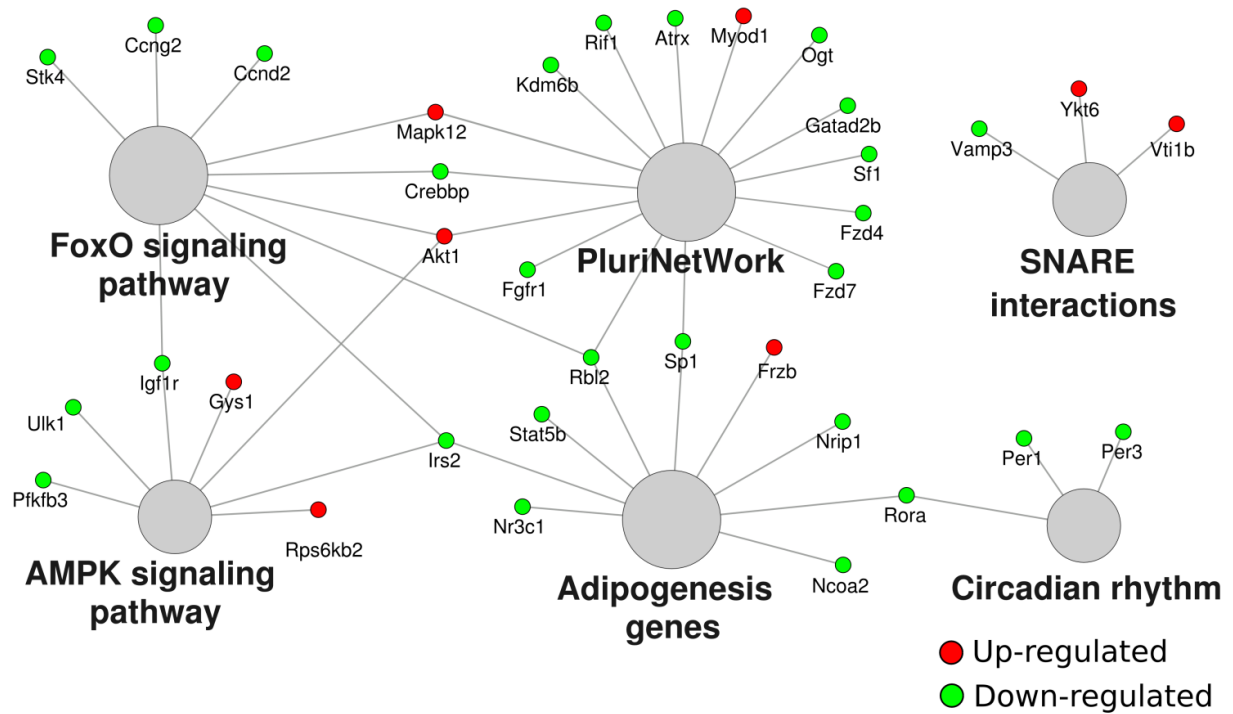

**Figure S2. CluePedia networks of the main functionally enriched pathways and differentially expressed genes in sympathetic denervated and sham mice.**

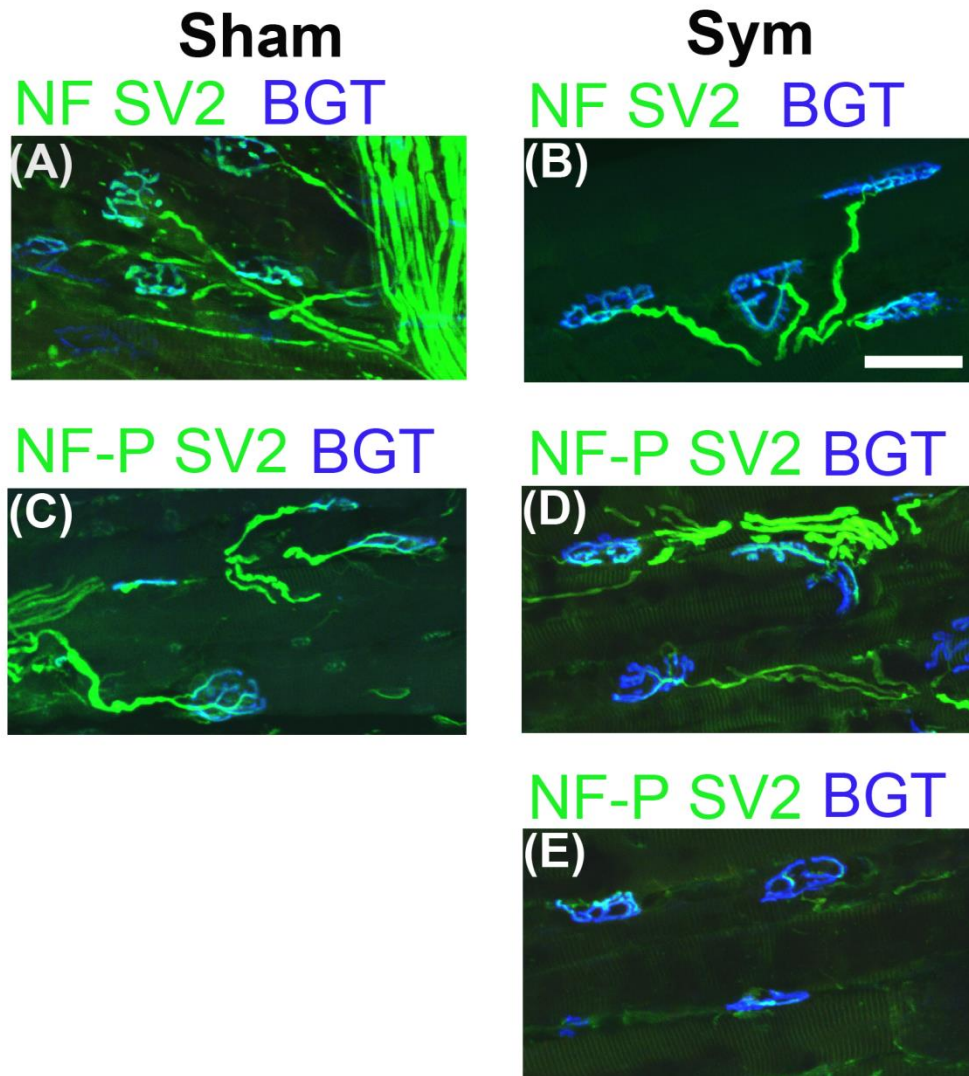

**Figure S3. Compromised NF phosphorylation in the Extensor Digitorum Longus (EDL) muscle after lumbar sympathectomy.** Z-stack confocal microscopy images of EDL muscles from sham-operated (A, C) and 7 day lumbar sympathectomized (B, D, E) mice. Panels A and B show NMJ staining with nonphosphorylated NF (SMI 311 Ab) plus SV2 Ab (green, AF488) and BGT-680 (blue, cy5.5); C, D and E show staining of phosphorylated NF (SMI 312 Ab) plus SV2 Ab (green, AF488) and BGT-680 (blue, cy5.5). Light blue indicate NF-SV2 and BGT co-registration. Immunoreactivity to NF-P and SV2 antibodies is positive in the muscle from a sham mouse (c) but variable 7 days after sympathectomy (D, E). Images are representative of results for 105 NMJs in 3 EDL muscles from 3 sham mice and 69 NMJs in 3 muscles from 3 sympathectomized mice. Calibration bar = 50 $\mu$ m.

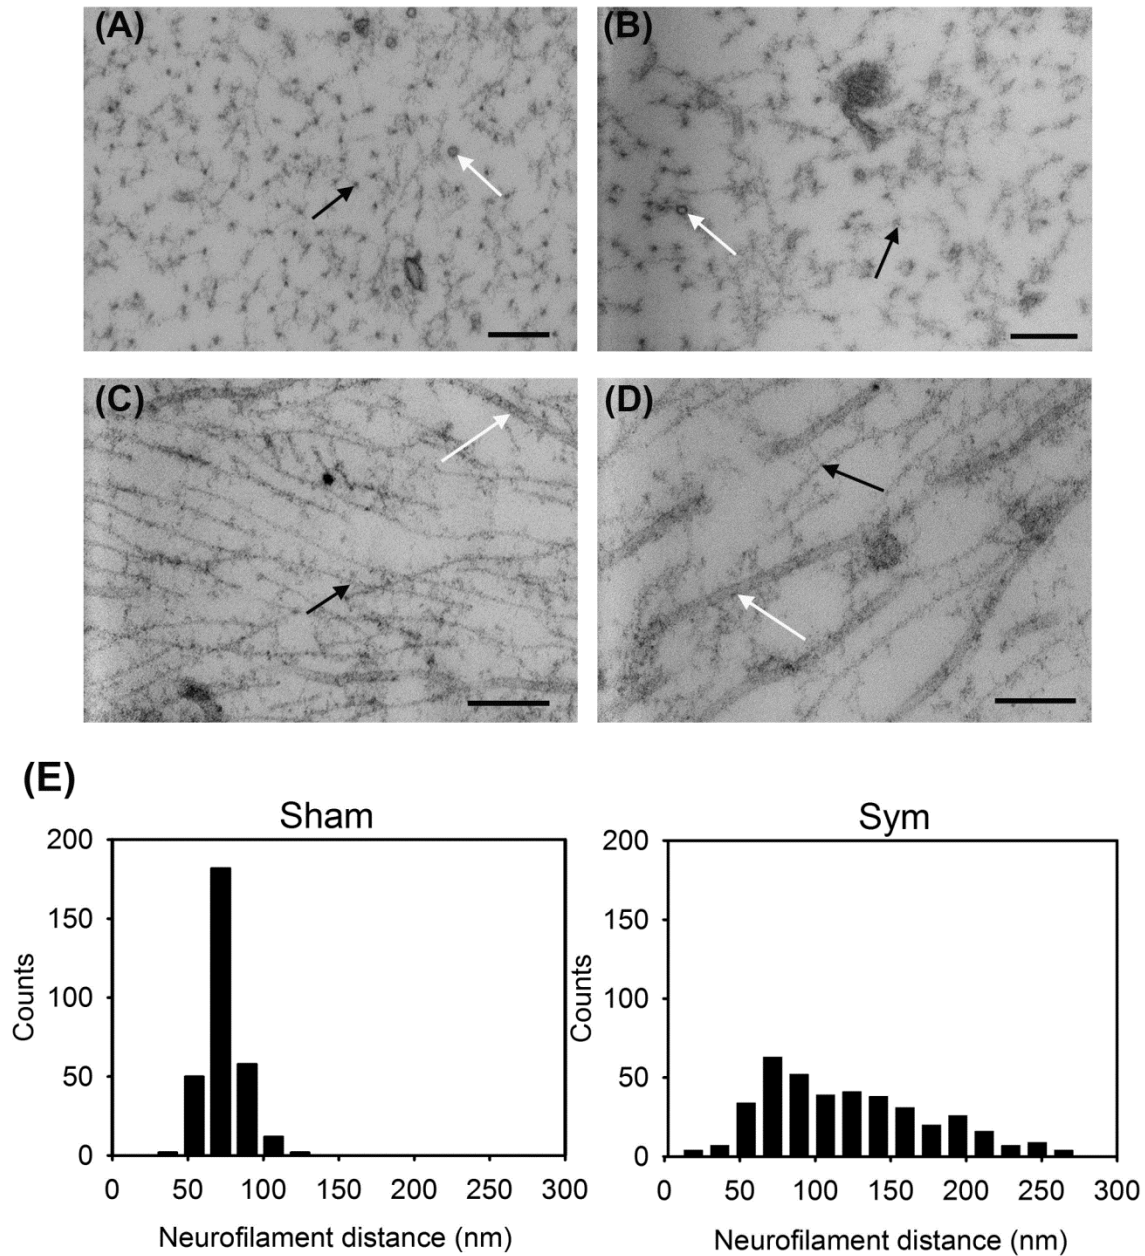

**Figure S4. Transmission electron micrographs of neurofilament (black arrows) and microtubule (white arrows) disorganization in the tibioperoneal nerve from sympathectomized mice.** Representative tibioperoneal nerve cross-sections (A, B) and longitudinal (C, D) sections from sham (A, C) and sympathectomized (B, D) mice. Bar = 100 nm. Quantification of the distance between neurofilaments in 5-7 axons in nerves from sham (n = 3) and sympathectomized (3) mice. (E).

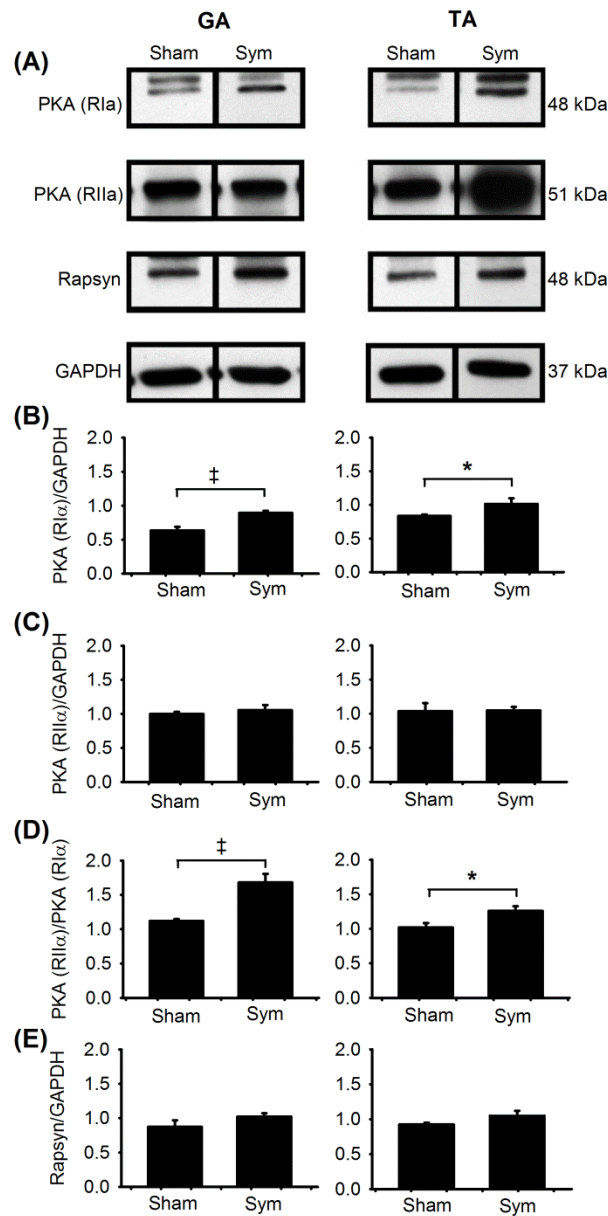

**Figure S5. SNS ablation increases PKA (RI $\alpha$ ) but decreases the PKA(RII $\alpha$ )/ PKA(RI $\alpha$ ) ratio, with no changes in rapsyn. A.** Illustrations of PKA(RI $\alpha$ ), PKA(RII $\alpha$ ), and rapsyn in GA and TA muscles. Quantification of PKA (RI $\alpha$ ) (B), PKA(RII $\alpha$ ) (C), the PKA(RII $\alpha$ )/ PKA(RI $\alpha$ ) ratio (D), and rapsyn (E) in TA and GA muscles. N = 4 GA or TA muscles from 4 mice per group. \*  $P < 0.05$  and †  $P < 0.001$



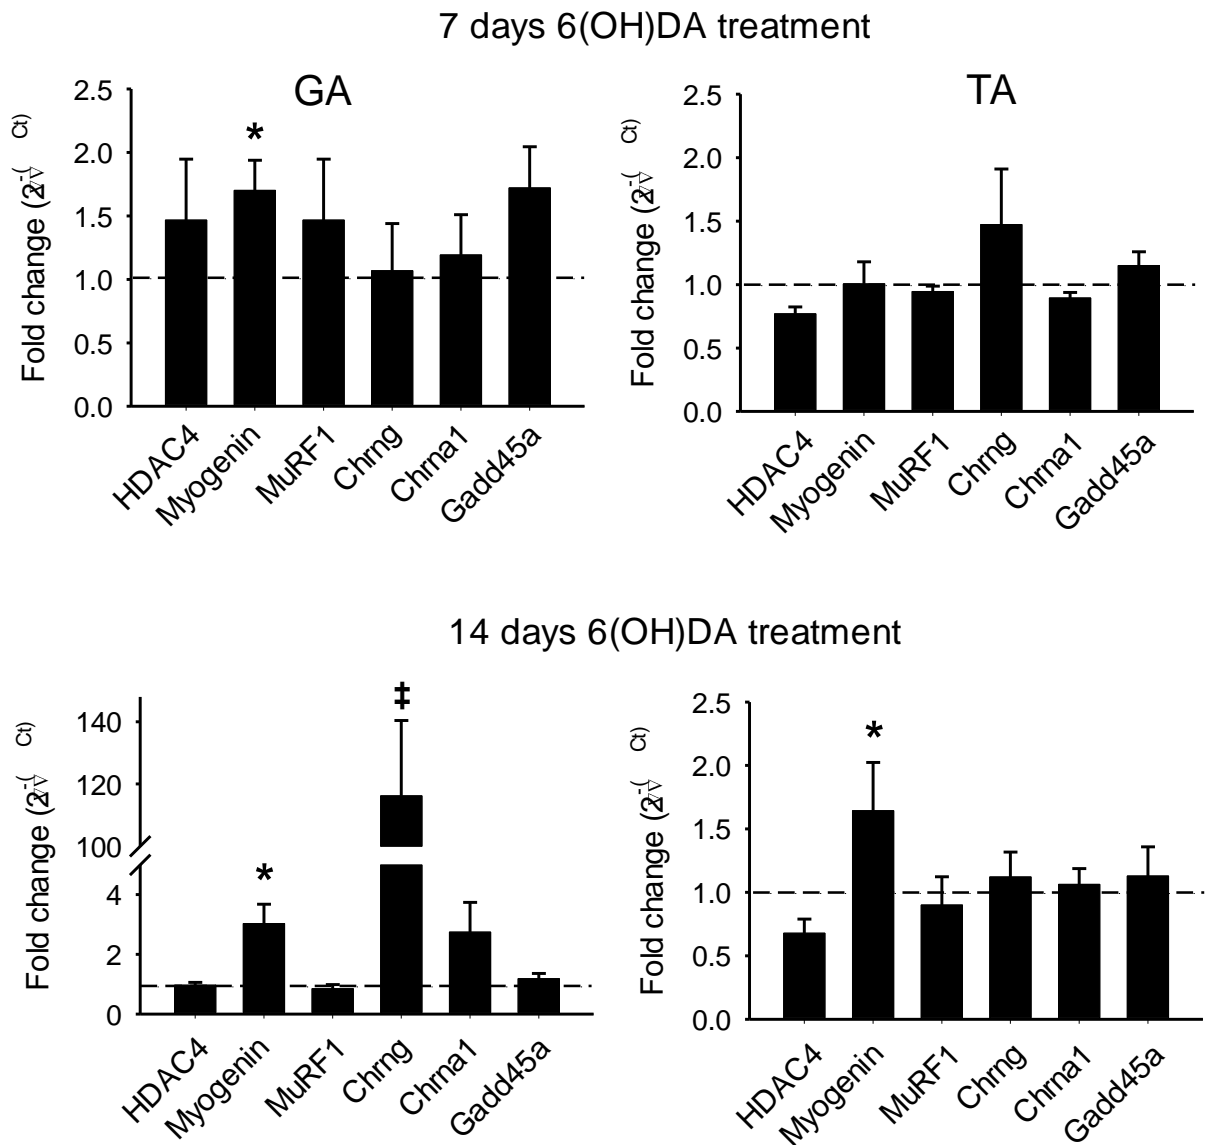

**Figure S6. Increased expression of genes associated with skeletal muscle denervation in chemically sympathectomized mice.** Gene expression in GA and TA muscles from 8-week old C57BL6 mice injected with 6(OH)DA (n=4 mice) or vehicle (n = 4) on alternate days for 7 or 14 days. All samples were run in triplicate. \*  $P < 0.05$  and ‡  $P < 0.001$

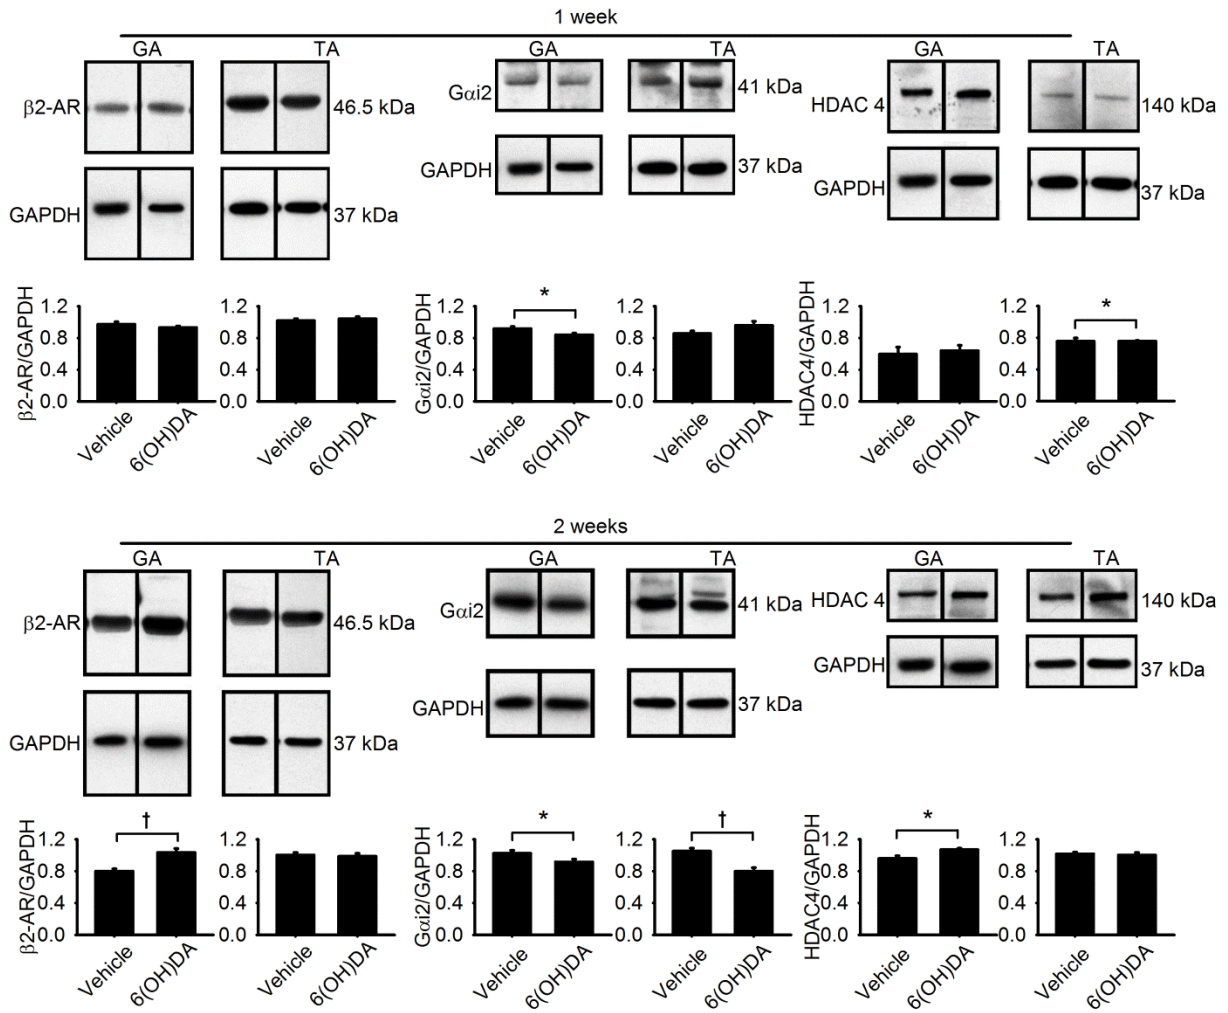

**Figure S7.  $\beta 2$ -AR,  $G\alpha_{i2}$  and Hdac4 protein levels in chemically sympathectomized mice.**

Protein levels in GA and TA muscles from 8-week old C57BL6 mice injected with 6(OH)DA

(n=4 mice) or vehicle (n = 4) on alternate days for 7 or 14 days. \*  $P < 0.05$  and †  $P < 0.01$

## **Video 1:**

### **Spatial relationship between sympathetic axons and $\alpha$ -BGT postterminals**

The video *Lumbricalis iDISCO 40XTH BGT 031516.avi* shows the relationship between sympathetic axons (green) and  $\alpha$ -BGT+ (red) postterminals in a lumbricalis muscle. The Z-stack, consisting of 33 images of 2.32  $\mu\text{m}$ /optical slice (image size: 211 x 211  $\mu\text{m}$ , resolution: 0.132  $\mu\text{m}$ /pixel, 12 bits/pixel) were recorded at a sampling speed of 2 $\mu\text{s}$ /pixel with an Olympus FV1200/IX83 spectral laser scanning confocal microscope using a UPLFLN40X0 objective, NA 1.3.

### **RNA Microarrays for sympathectomized and sham mice:**

RNA Microarrays in GA muscle from both mice groups have been uploaded as Excel spreadsheets (*Microarray\_Sym vs Sham*). The worksheet *Sym\_vs\_Sham* lists the 182 most significantly modified genes (see **Figures 2 and S2**).

### **Comparison of RNA microarrays for sympathectomized and sciatic denervated<sup>44</sup> mice.**

The Excel file *twoDataSets\_comparison\_GSE1893 and WF* provides a detailed analysis of up- and down-regulated genes in both datasets. Using DAVID functional assessment, these genes clustered into 60 gene ontology (GO) term enrichment and KEGG pathways.
